# Supplementary material
Source: PubMed Central journal article supplement (PMC166429)

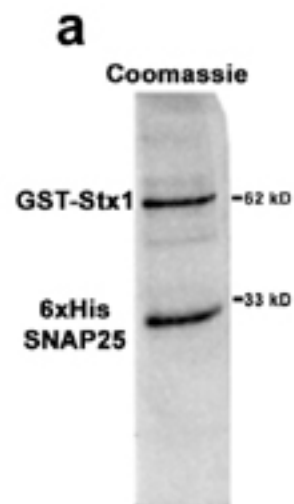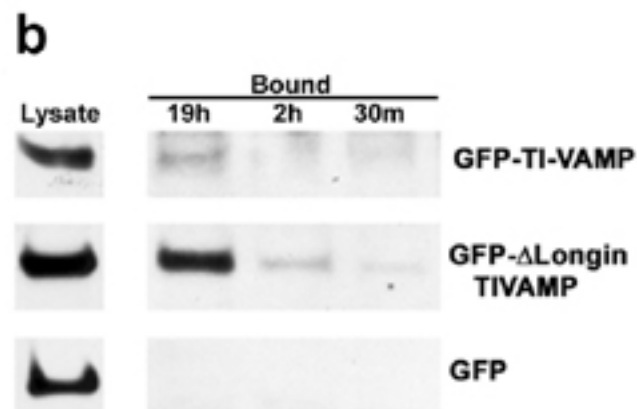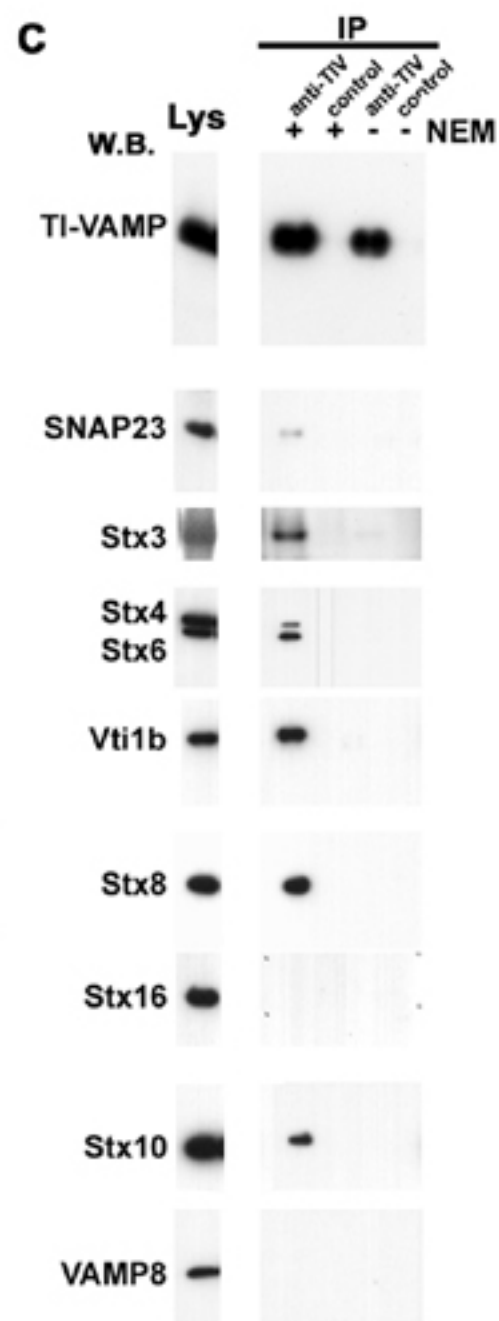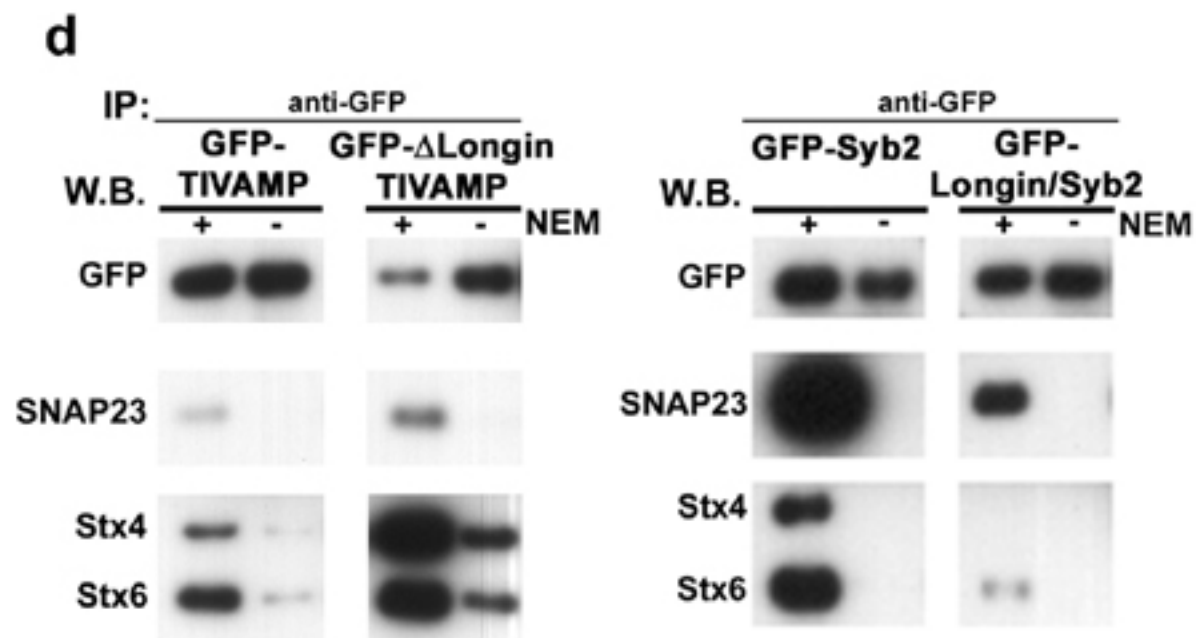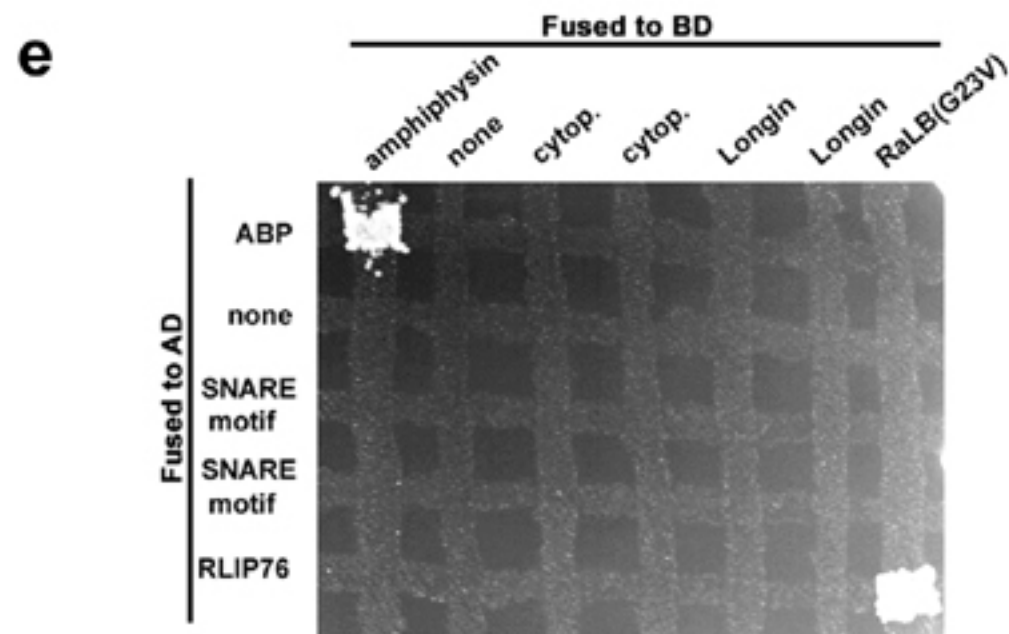

Supplement: pnas_1431910100_2.pdf [file pnas_1431910100_2.pdf]

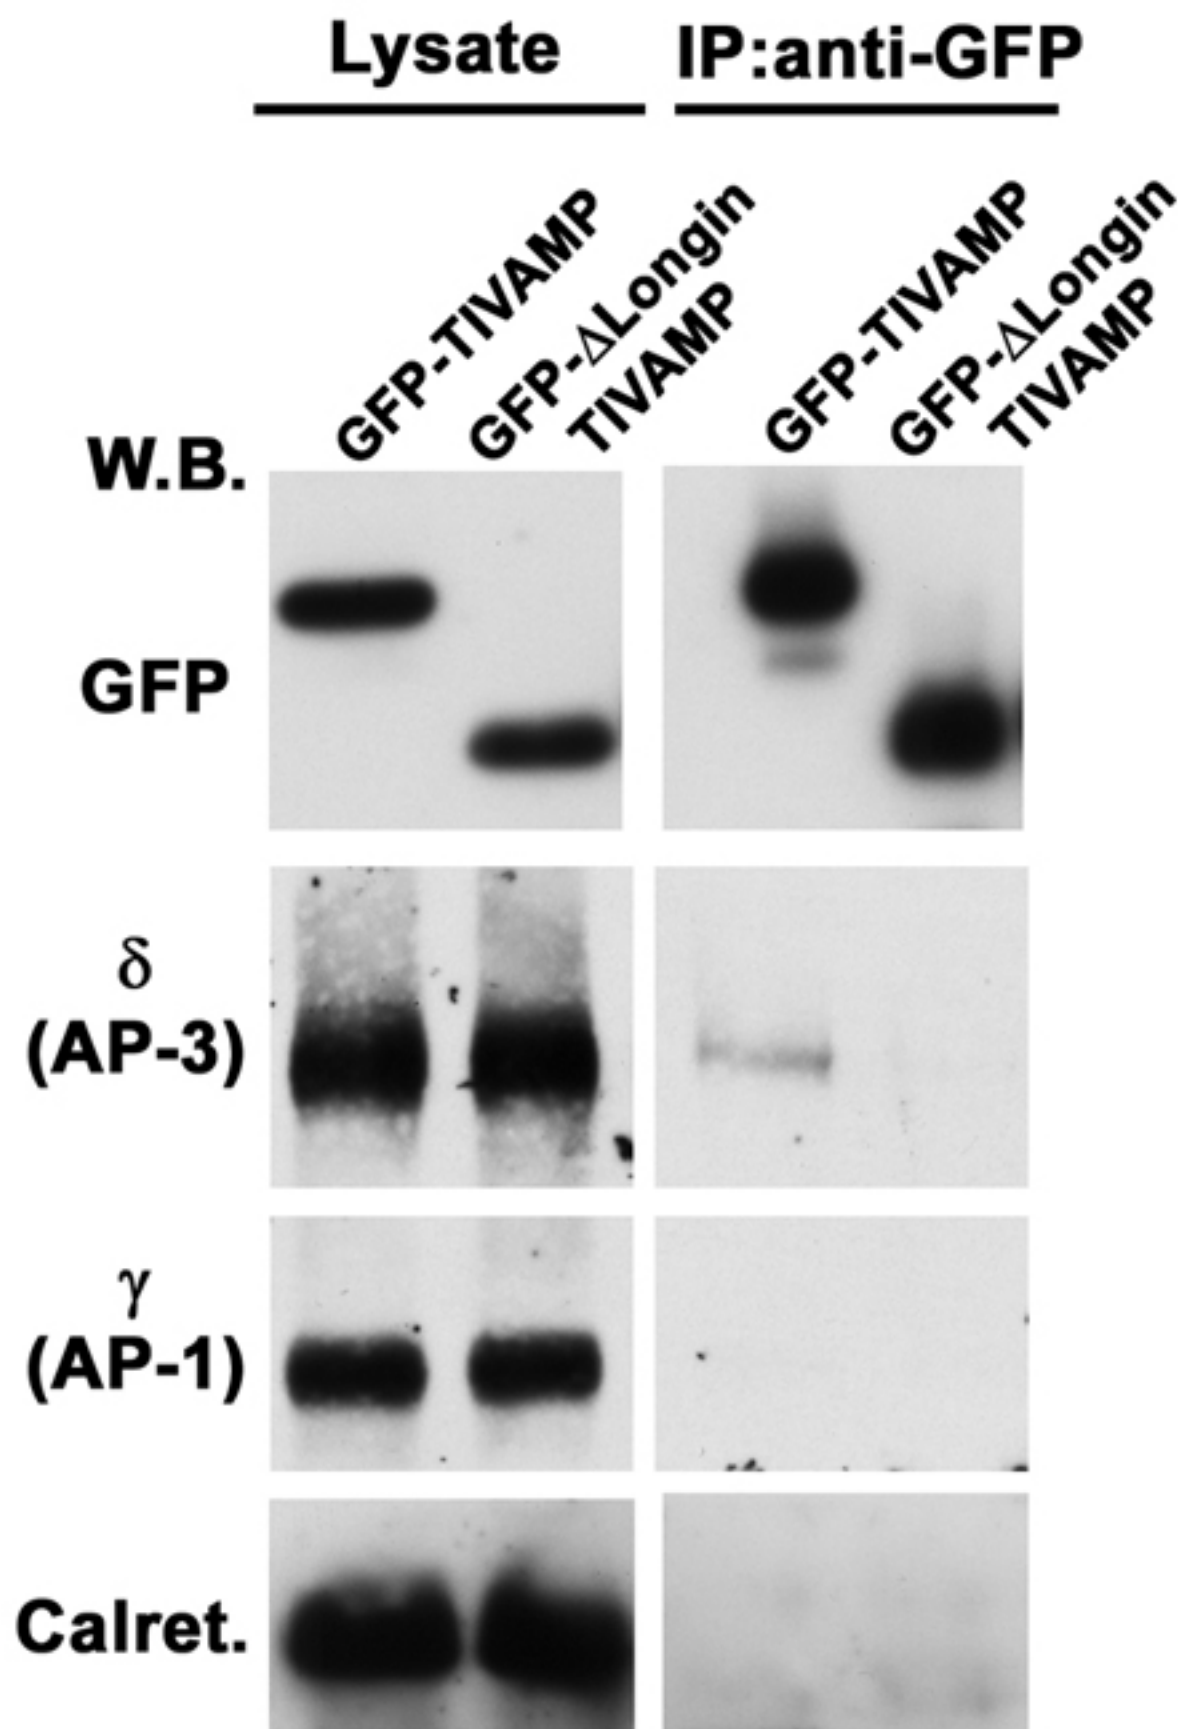

Supplement: pnas_1431910100_4.pdf [file pnas_1431910100_4.pdf]

**a**

TIVAMP-GFP 

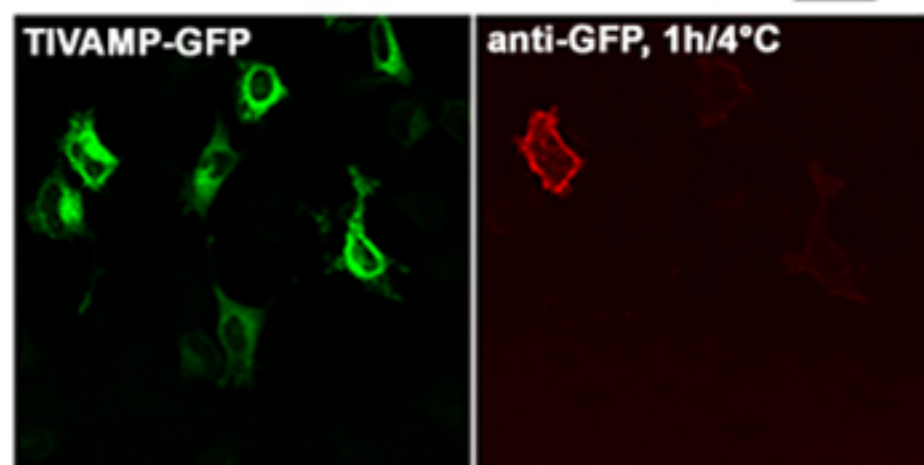

$\Delta$ Longin-TIVAMP-GFP 

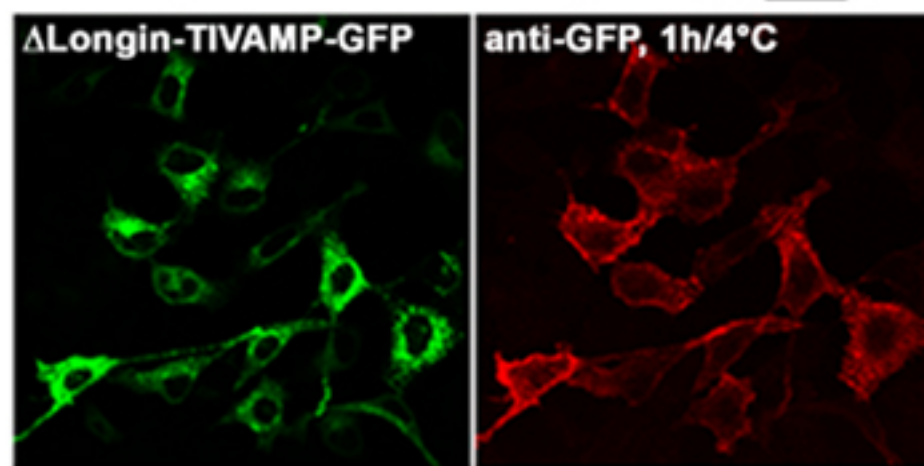**b**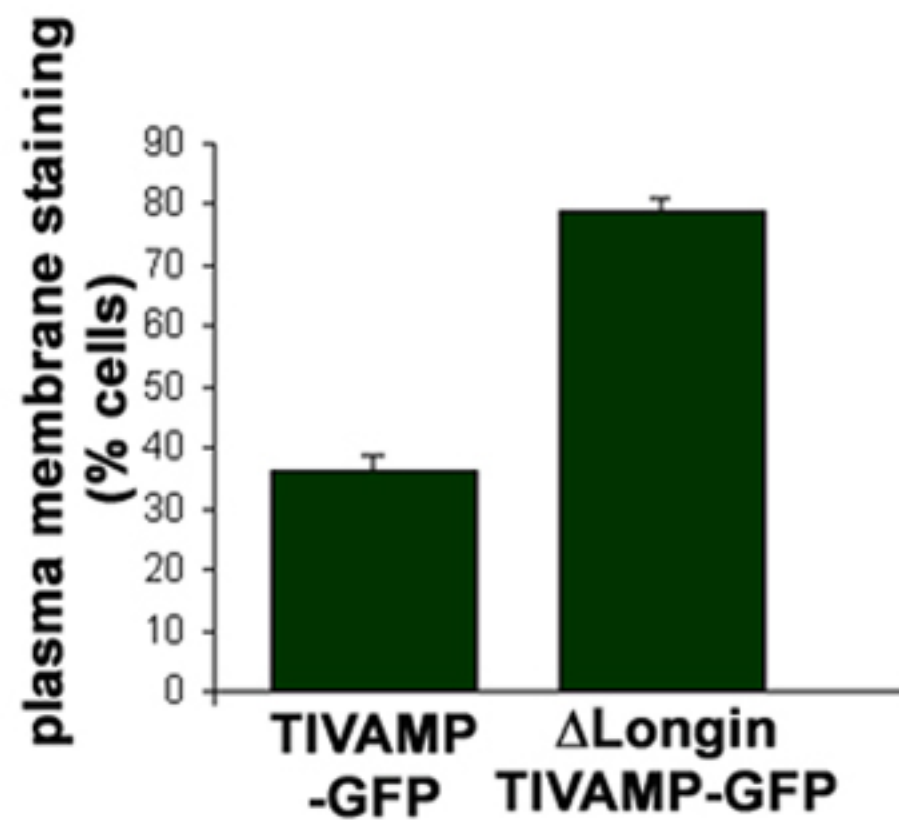

Supplement: pnas_1431910100_6.pdf [file pnas_1431910100_6.pdf]
